# Supplementary material
Source: Elsevier journal article supplement (https://www.sciencedirect.com/science/article/pii/S1575092214001673)
Supplement: mmc1 [file S1575092214001673:mmc1.docx]

Supplementary table 1: Individual SSTR2 and SSTR5 immunostaining scores

|  | **SSTR2** | **SSTR5** | **P** |
| --- | --- | --- | --- |
| **Octr naïve (n=17), mean ± SD** | **56.3 ± 15.2** | **69.1 ± 15.8** | **0.02** |
| 1 | 50 | 72 |
| 2 | 30 | 58 |
| 3 | 99 | 103 |
| 4 | 47 | 72 |
| 5 | 70 | 78 |
| 6 | 50 | 82 |
| 7 | 56 | 37 |
| 8 | 65 | 74 |
| 9 | 52 | 61 |
| 10 | 56 | 51 |
| 11 | 57 | 68 |
| 12 | 46 | 48 |
| 13 | 57 | 65 |
| 14 | 60 | 89 |
| 15 | 70 | 68 |
| 16 | 58 | 82 |
| 17 | 35 | 68 |
| **Octr responsive (n=11) mean ± SD** | **56.6 ± 16.2** | **70.18 ± 10.1** | **0.03** |
| 1 (complete) | 47 | 83 |
| 2 (complete) | 42 | 72 |
| 3 (complete) | 41 | 50 |
| 4 (complete) | 68 | 67 |
| 5 (complete) | 64 | 76 |
| 6 (partial) | 45 | 75 |
| 7 (partial) | 61 | 72 |
| 8 (partial) | 59 | 55 |
| 9 (partial) | 43 | 66 |
| 10 (partial) | 96 | 80 |
| 11 (partial) | 57 | 76 |
| **Octr resistant (n=9), mean ± SD** | **48.8 ± 12.9** | **69.1 ± 8.6** | **0.001** |
| 1 | 50 | 80 |
| 2 | 32 | 63 |
| 3 | 38 | 69 |
| 4 | 75 | 84 |
| 5 | 58 | 74 |
| 6 | 50 | 57 |
| 7 | 44 | 67 |
| 8 | 38 | 64 |
| 9 | 55 | 64 |
| **Total group (n=37), mean ± SD** | **54.6 ± 14.9** | **70.1 ± 12.3** | **<0.001** |
