# Supplementary material
Source: Elsevier journal article supplement (https://www.sciencedirect.com/science/article/pii/S1575092214001673)
Supplement: mmc2 [file S1575092214001673:mmc2.docx]

Supplementary table 2: Individual SSTR2 and SSTR5 normalized mRNA levels

|  | **SSTR2** | **SSTR5** | **P** |
| --- | --- | --- | --- |
| **Octr naÏve (n=9), median (IQR)** | **12 (0.4-29)** | **30 (3-97)** | **0.85** |
| 1 | 0 | 155 |
| 2 | 6 | 30 |
| 3 | 0 | 97 |
| 4 | 0.4 | 30 |
| 5 | 27 | 0.2 |
| 6 | 12 | 3 |
| 7 | 2679 | 266 |
| 8 | 96 | 1 |
| 9 | 59 | 15 |
| **Octr responsive (n=11) median (IQR)** | **8 (0.6-28)** | **63 (1-560)** | **0.03** |
| 1 (complete) | 19 | 568 |
| 2 (complete) | 42 | 78 |
| 3 (complete) | 2 | 1 |
| 4 (complete) | 30 | 30 |
| 5 (complete) | 0 | 0.2 |
| 6 (complete) | 2 | 63 |
| 7 (complete) | 13 | 64 |
| 8 (partial) | 3416 | 560 |
| 9 (partial) | 2 | 49 |
| 10 (partial) | 8 | 1112 |
| 11 (partial) | 2 | 0.9 |
| **Octr resistant (n=16), median (IQR)** | **5 (2-310)** | **75 (1-1605)** | **0.02** |
| 1 | 300 | 1788 |
| 2 | 28 | 68 |
| 3 | 0 | 68 |
| 4 | 20 | 0 |
| 5 | 0.9 | 270 |
| 6 | 0.3 | 2813 |
| 7 | 8 | 1422 |
| 8 | 0 | 2254 |
| 9 | 28 | 0.9 |
| 10 | 15 | 5115 |
| 11 | 1 | 1 |
| 12 | 0 | 82 |
| 13 | 1482 | 1 |
| 14 | 0.9 | 512 |
| 15 | 2 | 15 |
| 16 | 58 | 0.4 |
| **Total group (n=36), median (IQR)** | **8 (0.9-29)** | **63.5 (1-536)** | **0.03** |
